# Supplementary material for: Identification of microbial markers across populations in early detection of colorectal cancer
Source: PubMed Central journal article supplement (PMC8144394; doi:10.1038/s41467-021-23265-y), 2021-05-24
Supplement: 41467_2021_23265_MOESM2_ESM.pdf [file 41467_2021_23265_MOESM2_ESM.pdf]

## Descriptions of Additional Supplementary Files

### **Supplementary Data 1**

**Description:** Bacterial phyla differential tests (Pvalues) in healthy controls, adenomas and CRC

### **Supplementary Data 2**

**Description:** Differentially abundant ASVs between control and adenoma ( $P < 0.05$ ).

### **Supplementary Data 3**

**Description:** Differentially abundant ASVs between adenoma and cancer ( $P < 0.05$ ).

### **Supplementary Data 4**

**Description:** Gut microbiome-based markers discriminated between control and adenoma.

### **Supplementary Data 5**

**Description:** Gut microbiome-based markers discriminated between adenoma and cancer.

### **Supplementary Data 6**

**Description:** Biomarkers of two meta-analyses and this study for distinguishing control and CRC.

### **Supplementary Data 7**

**Description:** Node numbers of differential ASVs between control and adenoma.

### **Supplementary Data 8**

**Description:** Node numbers of differential ASVs between adenoma and cancer.

### **Supplementary Data 9**

**Description:** The input features of RF model for validation cohort 1.

### **Supplementary Data 10**

**Description:** The input features of RF model for validation cohort 2.

### **Supplementary Data 11**

**Description:** Differentially abundant pathways between control and adenoma ( $P < 0.05$ )

### **Supplementary Data 12**

**Description:** Differentially abundant pathways between adenoma and cancer ( $P < 0.05$ ).

### **Supplementary Data 13**

**Description:** Average distribution of each ASV of healthy subjects and adenoma patients.

### **Supplementary Data 14**

**Description:** Average distribution of each ASV of adenoma patients and CRC.

### **Supplementary Data 15**

**Description:** The input feature of RF models for non-CRC diseases.
